# Supplementary material
Source: PubMed Central journal article supplement (PMC6053355)
Supplement: NIHMS979301-supplement-Supplementary_Figures.pdf [file NIHMS979301-supplement-Supplementary_Figures.pdf]

Dynamics of the human and viral m6A RNA methylomes during HIV-1 infection of T cells

Gianluigi Lichinchi, Shang Gao, Yogesh Saletore, Gwendolyn Michelle Gonzalez, Vikas Bansal, Yinsheng Wang, Christopher Mason & Tariq M. Rana

Supplementary methods, figures and tables:

|                        |                                                                                                                     |
|------------------------|---------------------------------------------------------------------------------------------------------------------|
| Supplementary Methods  | Supplementary methods                                                                                               |
| Supplementary Figure 1 | m6A content of poly(A)-enriched RNA                                                                                 |
| Supplementary Figure 2 | METTL3, METTL14, and AlkBH5 knockdown efficiency                                                                    |
| Supplementary Figure 3 | 56 genes are uniquely methylated upon HIV-1 infection                                                               |
| Supplementary Figure 4 | RRE methylation is modulated by METTL3, METTL14, and AlkBH5 protein levels and affects nuclear export of viral RNAs |
| Supplementary Figure 5 | Frequency of adenosine mutation in HIV sequences                                                                    |
| Supplementary Figure 6 | Raw data for blots and gels                                                                                         |
| Supplementary Table 1  | HIV-1 and human RNA sequence summary                                                                                |
| Supplementary Table 2  | HIV-1-specific m6A transcripts                                                                                      |
| Supplementary Table 3  | shRNA sequences                                                                                                     |
| Supplementary Table 4  | Primer sequences                                                                                                    |

## **Supplementary Methods**

### **shRNA plasmids and lentiviral transduction**

Lentiviral particles for shRNA-mediated gene silencing were produced by transfection of 293T cells with pLKO (shRNA), psPAX2 (packaging), and pMD2.G (envelope) plasmids (1:0.75:0.25 ratio) using Lipofectamine 2000. After 2 days, the supernatant was collected, filtered, mixed with 5 µg/ml Polybrene, and added to MT4 cells overnight. The supernatant was then removed, and the cells were washed in PBS and resuspended in fresh RPMI/10% FBS. Three days after lentiviral transduction, cells were infected with HIV-1 as described above. Cells were used for experiments at 3 days post-infection. pLKO shRNA plasmids were purchased from Sigma (Mission shRNA Library). ShRNA sequences are listed in Supplementary Information Table 3.

### **Western blot analysis**

MT4 cells (106/sample) were lysed in M-PER buffer (Pierce), and samples of 20 µg total protein were resolved by 12% SDS-PAGE and transferred to PVDF membranes (Bio-Rad). Membranes were blocked for 1 h at room temperature with 2% BSA in PBST (PBS/0.1% Tween 20), incubated for 1 h with primary antibodies (1:1,000 dilution in BSA/PBST), washed with PBST, and then incubated for 1 h with secondary antibodies (1:10,000 dilution in BSA/PBST). Antibodies used were: rabbit monoclonal anti-GAPDH (D16H11, Cell Signaling Technology), rabbit polyclonal anti-METTL3 (15073-1-AP, Proteintech Group), rabbit polyclonal anti-METTL14 (HPA038002, Sigma), mouse polyclonal AlkBH5 (SAB1407587, Sigma), rabbit anti-gag p24 antiserum (65-005, BioAcademia), mouse monoclonal anti-Rev antibody (1G7, NIH AIDS Reagent Program), mouse monoclonal anti-FLAG M2 (F3165, Sigma), IRDye 680-conjugated anti-mouse IgG (LiCor), and IRDye 800-conjugated anti-rabbit IgG (LiCor).

### **Northern blot analysis**

5'-amino-modified DNA oligonucleotides specific for HIV-1 RNA were purchased from IDT. The anti-HIV-1 probe sequences were:

anti-gag: CCCGCTTAATACTGACGCTCTCGCACCCA,  
anti-vif: ATCCCTAATGATCTTTGCTTTTCTTCTTGCACTACT,  
anti-nef: GCTCAGCTCGTCTCATTTCTTCCCTTACAGTAG.

Oligonucleotide conjugation with Alexa Fluor 680 NHS ester was performed in 0.1 M sodium tetraborate, pH 8.5, for 3 h at room temperature. 0.2 mg of NHS ester was dissolved in 30 µL of DMSO and 200 µL of water, mixed with 20 µg of oligo. The conjugation reaction was carried out at rt for 3 hr and then blocked with Tris-buffer, pH 7.5, final concentration of 50 mM followed by precipitation with sodium acetate and ethanol. RNA was extracted with Trizol reagent according to the manufacturer's instructions. 5 µg total RNA were loaded for each lane on a 1% agarose/0.4% formaldehyde gels in 20 mM HEPES and 1.5 mM EDTA, pH 7.8. Northern blotting was performed using a NorthernMax kit (Ambion).

### **RT-qPCR analysis**

cDNA was prepared from 1 µg total RNA using iScript Supermix (Bio-Rad). qPCR reactions were performed using SSoAdvanced SYBR Green Mix (Bio-Rad) with a LightCycler 480 instrument (Roche). Quantification of the relative fold change in mRNA was performed by the  $\Delta\Delta C_p$  method. PCR primers are listed in Supplementary Information Table 4.

## **Supplementary Figures**

**Supplementary Figure 1.** m6A content of poly(A)-enriched RNA. Poly(A) RNA was isolated from uninfected (Ctrl) and HIV-1-infected MT4 cells with an oligo(dT)-mRNA isolation kit. Enriched fractions were quantified, serially diluted, and immunoblotted with an antibody against m6A. The data is a representative of five independent experiments.

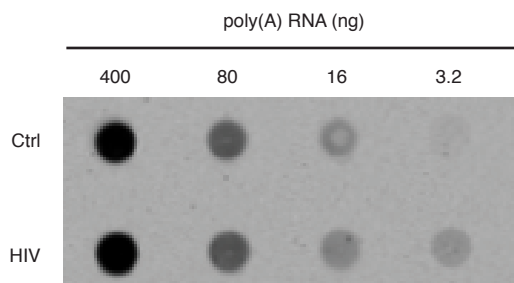

**Supplementary Figure 2.** METTL3, METTL14, and AlkBH5 knockdown efficiency. MT4 cells were infected with lentiviruses encoding the indicated shRNAs, and 3 days later, knockdown efficiency was assessed by western blot (left) and RT-qPCR (right) analyses. GAPDH served as a loading control for western blotting. The data is a representative of five independent experiments (n=3). RT-qPCR results are the mean  $\pm$  s.e.m. of 5 independent experiments and are expressed as the mRNA level relative to that in cells expressing nontargeting control (NTC) shRNA. n indicates the number of technical replicates.

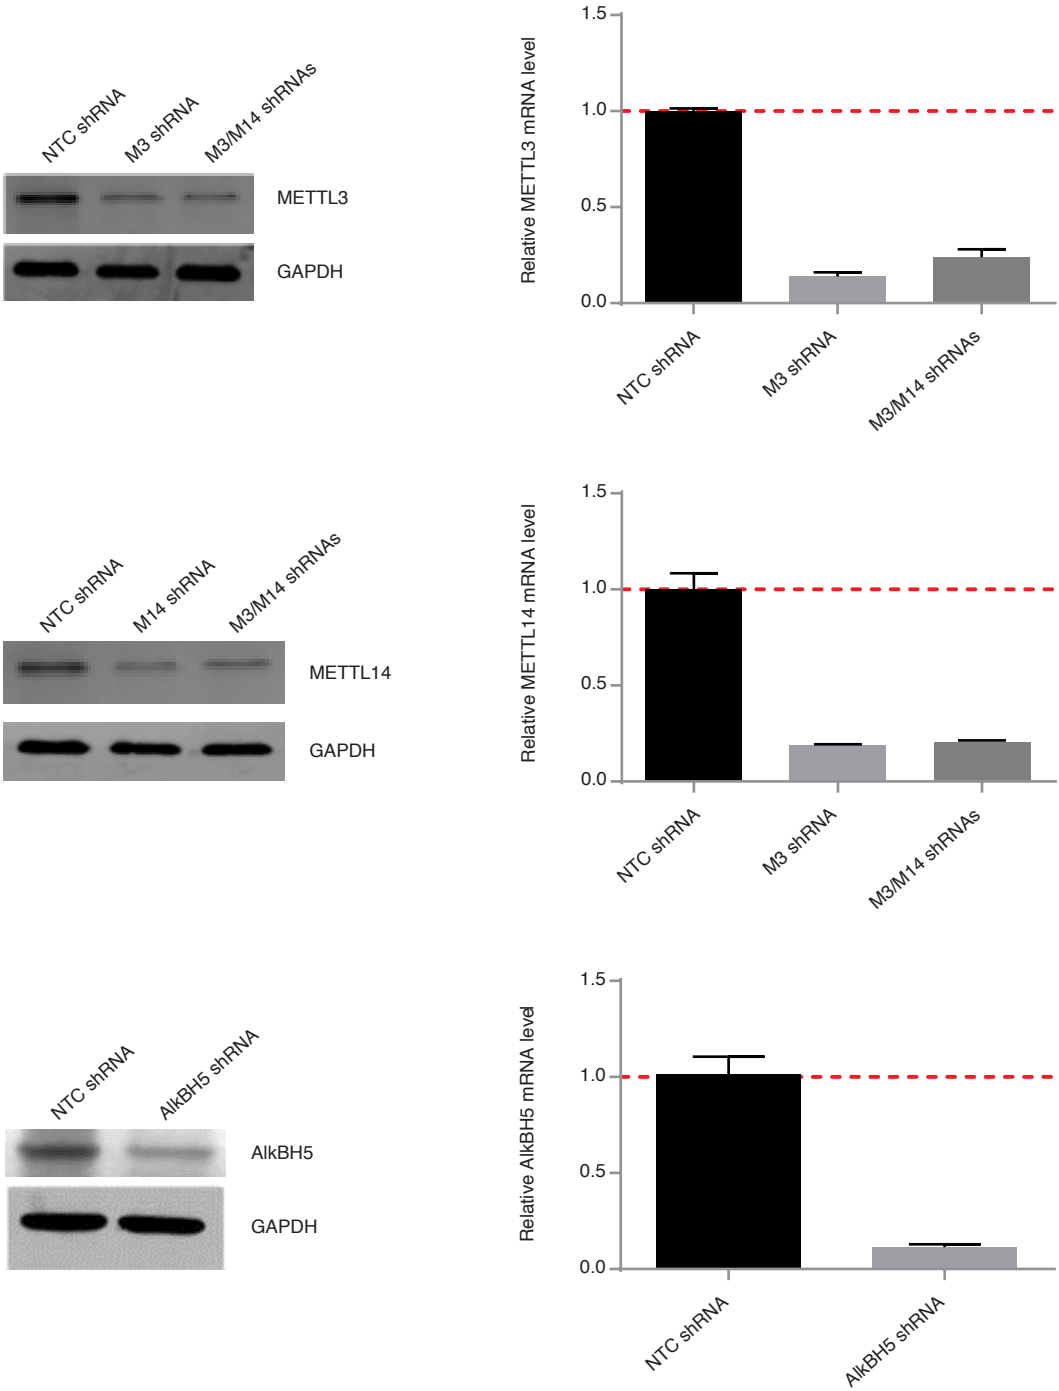

**Supplementary Figure 3.** 56 genes are uniquely methylated upon HIV-1 infection. a, gene ontology analysis of the uniquely methylated genes during HIV-1 infection. The 10 most enriched categories are shown. Fifty-six genes identified to be uniquely methylated during HIV-1 infection are enriched in virus-related categories. b, Normalized read densities for GTF2I, PSIP1, SIAH2, STARD4, ETS2, DUT and ABHD16A are shown for input and MeRIP in uninfected and HIV-infected samples. The read densities are indicative of 2 technical replicates.

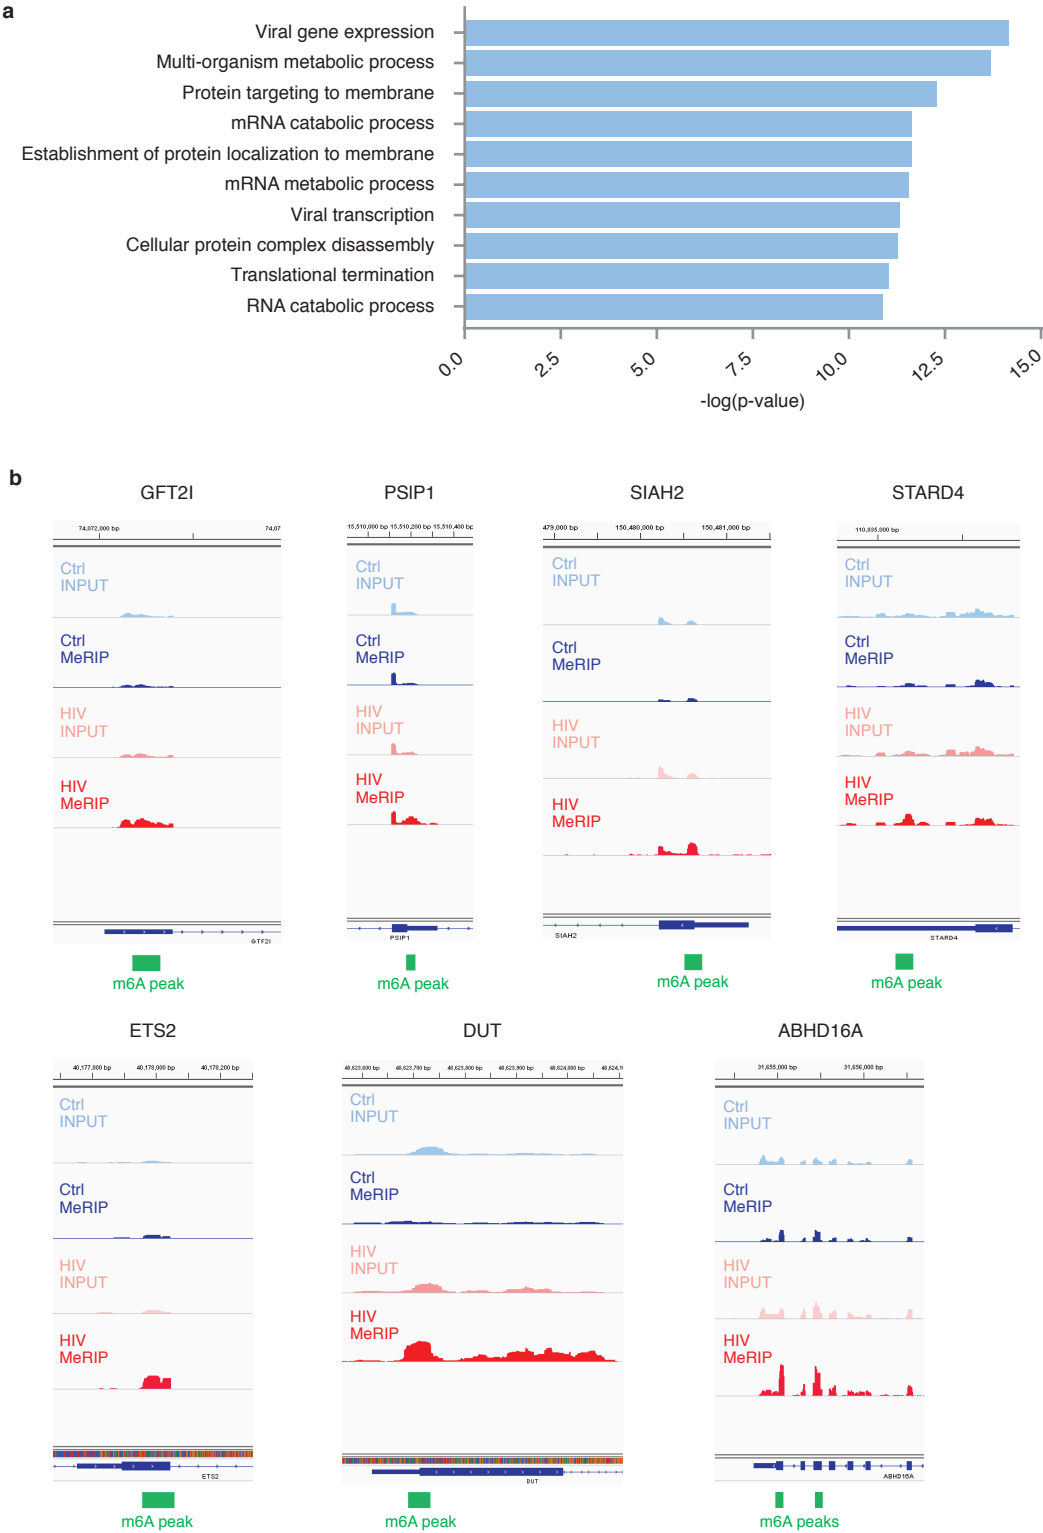

**Supplementary Figure 4.** RRE methylation is modulated by METTL3, METTL14, and AlkBH5 protein levels and affects nuclear export of viral RNAs. a, RRE RNA methylation level is directly modulated by methyltransferase and demethylase expression. MeRIP/RT-qPCR for RRE RNA was performed in MT4 cells depleted of METTL3/METTL14 or AlkBH5 and subsequently infected with HIV-1 LAI virus. RNA was extracted, poly(A) enriched, fragmented, immunoprecipitated with anti-m6A antibody, and analysed by RT-qPCR. Results are the mean  $\pm$  s.e.m. of three independent experiments (n=3) and are expressed as the fold enrichment of minimal RRE RNA in anti-FLAG versus control IgG IPs. b, RIP experiments were performed as described in Fig 3b, except that 293T cells were co-transfected with FLAG-Rev and pcDNA3\_minRRE, which encodes the minimal RRE. Results are the mean  $\pm$  s.e.m. of three independent experiments (n=3) and are expressed as the fold enrichment of minimal RRE RNA in anti-FLAG versus control IgG IPs. c, RIP efficiency was assessed by western blot analysis of input material and immunoprecipitated fractions of poly(A)-enriched RNA from 293T cells. Top: RIP efficiency analysis for the Rev in pLAI2 expression system. Bottom: RIP efficiency analysis for the FLAG-Rev and pcDNA3\_minRRE co-expression system. The data is a representative of three independent experiments. d, Cytoplasmic and nuclear fractionation was performed on NTC, M3/M14 and AlkBH5 knock-down 293T cells. Viral RNA distribution in the two compartments is relative to the viral RNA content from total cellular RNA. Results are the mean  $\pm$  s.e.m. of three independent experiments (n=4). P-values are calculated by unpaired two-tailed Student's t-test. n indicates the number of technical replicates.

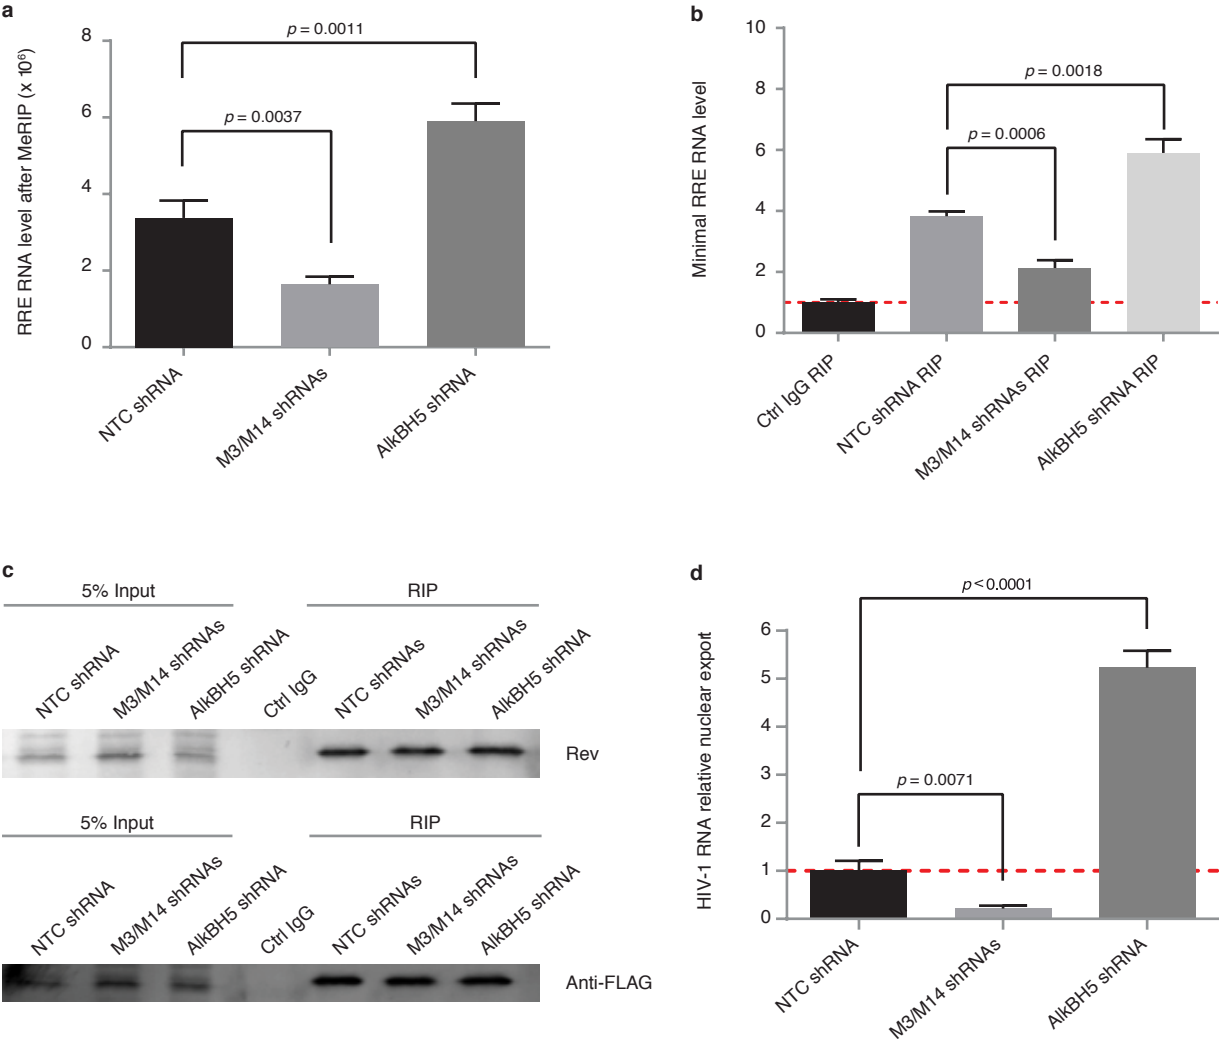

**Supplementary Figure 5.** Frequency of adenosine mutation in HIV sequences. A total of 2,501 sequences of HIV-1 isolated from infected patients were aligned to the reference HXB2 HIV genome, and the mutation frequency was calculated for all adenosines (As). We downloaded aligned FASTA sequences for 2501 HIV genomes from the HIV database and processed them using a custom Python program. For each position in the reference HXB2 genome, the differences in nucleotides (A, C, T, G and – [gap]) were calculated using the alignment matrix. The position, length, and frequency of insertion/deletion events were also determined using the gaps in the aligned FASTA sequences. Mutation frequencies for total HIV-1, RRE, stem loop IIB in the RRE, and two specific adenosines at positions 7787 and 7883 are shown. Results are the mean + s.d. of 2,501 sequences.

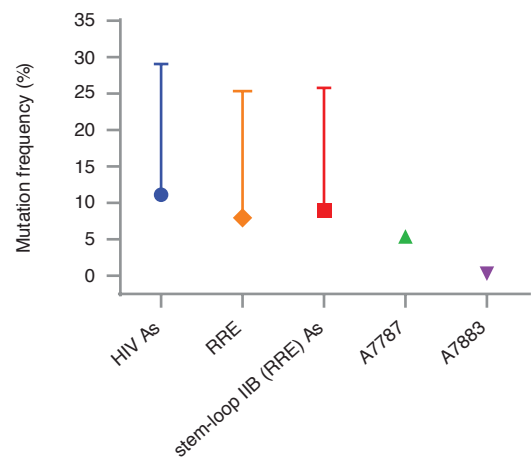

**Supplementary Figure 6.** Raw data for blots and gels. Raw data for blots and gels included in the manuscript are shown and labeled with molecular weight markers and corresponding figure numbers in the manuscript and supplementary material.

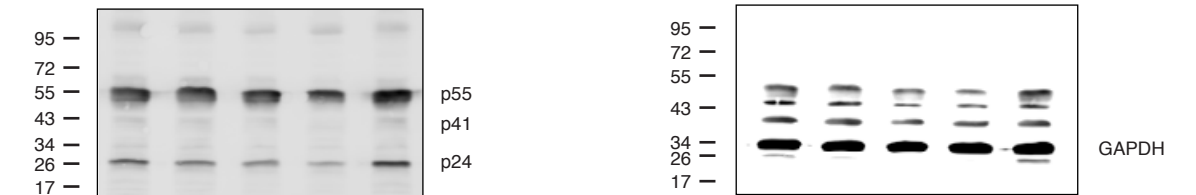

Corresponding to Figure 1c

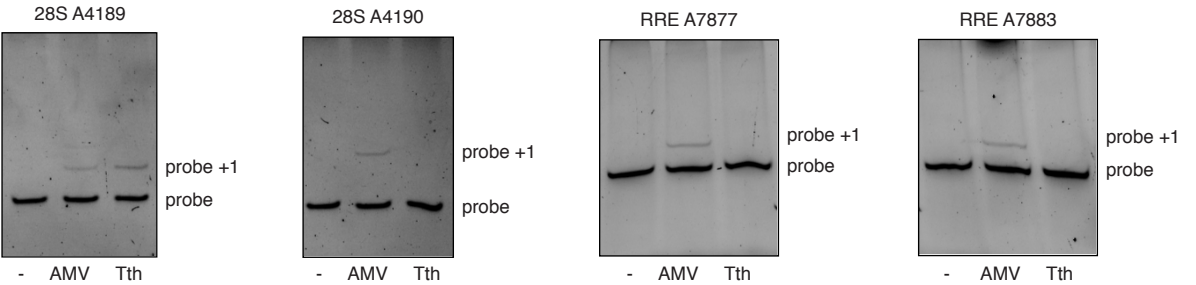

Corresponding to Figure 3c

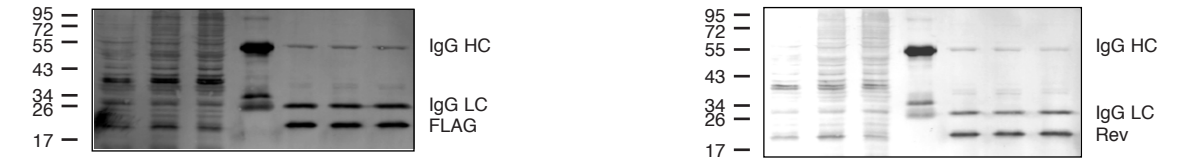

Corresponding to Supplementary Figure 4c

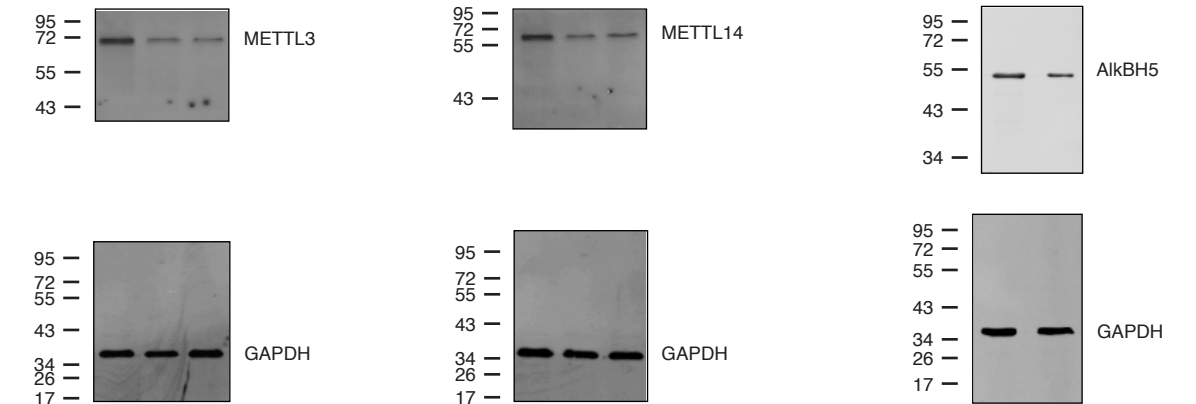

Corresponding to Supplementary Figure 2



**Supplementary Table 2.** HIV-1-specific m6A transcripts

| Gene Symbol     | Molecular Function                 | Previously linked to HIV-1 | Reference (PMID) |
|-----------------|------------------------------------|----------------------------|------------------|
| AKIRIN1         | Cytoskeleton organization          |                            |                  |
| PLK3            | Kinase                             |                            |                  |
| PTRHD1          | Peptidyl-tRNA hydrolase            |                            |                  |
| B3GNT2          | Glucosaminyltransferase            |                            |                  |
| MOGS            | Glucosidase                        | Yes (+)                    | 25318123         |
| DUSP2           | Phosphatase                        |                            |                  |
| MZT2B           | Cytoskeleton organization          |                            |                  |
| TTN-AS1         | Not known                          |                            |                  |
| RPL32           | Ribosomal protein                  |                            |                  |
| ZBED2           | DNA binding                        |                            |                  |
| FAM162A         | Apoptosis                          |                            |                  |
| SIAH2           | Ubiquitin protein ligase           |                            |                  |
| MFSD10          | Membrane transporter               |                            |                  |
| GPR125          | G-protein coupled receptor         |                            |                  |
| RPS23           | Ribosomal protein                  |                            |                  |
| COX7C           | Cytochrome C subunit               |                            |                  |
| STARD4          | Sterol transport                   |                            |                  |
| RPS14           | Ribosomal protein                  |                            |                  |
| ABHD16A         | abhydrolase                        |                            |                  |
| HSPA1A          | Chaperone                          | Yes (+/-)                  | 21970979         |
| HLA-DPA1        | MHC class II protein               | Yes                        | 22860026         |
| GTF2I           | Transcription factor               | Yes (+)                    | 21613400         |
| ZNHIT1          | Transcription                      |                            |                  |
| ATP6V1F         | ATPase                             |                            |                  |
| RPL30           | Ribosomal protein                  |                            |                  |
| PSIP1           | DNA binding                        | Yes (+)                    | 24261564         |
| OSTF1           | Stimulating factor                 |                            |                  |
| HNRNPK          | Ribonucleoprotein                  | Yes (+)                    | 18854243         |
| TRAF2           | TNF receptor-associated factor     | Yes (+)                    | 23774506         |
| RPLP2           | Ribosomal protein                  |                            |                  |
| PRKCSBP         | PKC binding protein                |                            |                  |
| ILK             | Kinase                             |                            |                  |
| DENND5A         | Golgi trafficking                  |                            |                  |
| EIF3M           | Translation                        | Yes                        | 22174317         |
| TUBA1B          | Cytoskeleton organization          | Yes (+)                    | 19460752         |
| CCT2            | Chaperone                          | Yes (+)                    | 18976975         |
| PABPC3          | poly(A)-binding protein            | Yes (+)                    | 19460752         |
| HAUS4           | Cytoskeleton organization          |                            |                  |
| SRSF5           | Splicing factor                    | Yes (+)                    | 22933280         |
| C14orf1         | Not known                          |                            |                  |
| DUT             | deoxyuridine triphosphatase        | Yes                        | 22944692         |
| UBL7            | Ubiquitin-like protein             |                            |                  |
| COX5A           | Cytochrome C subunit               |                            |                  |
| NDE1            | Not known                          |                            |                  |
| CBFB            | HIV Vif function                   | Yes (+)                    | 22190037         |
| APRT            | adenine phosphoribosyl transferase |                            |                  |
| RNASEK          | RNAse                              |                            |                  |
| RNASEK-C17orf49 | Not known                          |                            |                  |
| MYL12A          | myosin, regulatory                 | Yes                        | 19794400         |
| MBD2            | methyl-CpG binding protein         | Yes                        | 19454010         |
| UBA52           | Ubiquitin-ribosomal protein        | Yes                        | 23874603         |
| RPS16           | Ribosomal protein                  |                            |                  |
| RPS5            | Ribosomal protein                  | Yes                        | 22174317         |
| MIR3648-1       | Not known                          |                            |                  |
| ETS2            | Transcription factor               | Yes (+)                    | 18854154         |
| MAGED2          | p53 function                       |                            |                  |

Yes: HIV-related gene, no functional data available.

Yes (+): HIV-related gene, proviral function.

Yes (+/-): HIV-related gene, uncertain function.

Supplementary Table 3. shRNA sequences

| shRNA                       | Sequence                                                   |
|-----------------------------|------------------------------------------------------------|
| Non targeting control (NTC) | CCGCAGGTATGCACGCGT                                         |
| METTL3-1                    | CCGGGCAAGTATGTTCACTATGAACTCGAGTTTCATAGTGAACATACTTGCTTTTTG  |
| METTL3-2                    | CCGGGCAAGGAACAATCCATTGTTCTCGAGAACAATGGATTGTTCCCTGGCTTTTTG  |
| METTL14-1                   | CCGGCCATGTACTTACAAGCCGATACTCGAGTATCGGCTTGTAAGTACATGGTTTTT  |
| METTL14-2                   | CCGGGCCGTGGACGAGAAAGAAATACTCGAGTATTTCTTTCTCGTCCACGGCTTTTT  |
| AlkBH5-1                    | CCGGGAAAGGCTGTTGGCATCAATACTCGAGTATTGATGCCAACAGCCTTTCTTTTTG |
| AlkBH5-2                    | CCGGCCACCCAGCTATGCTTCAGATCTCGAGATCTGAAGCATAGCTGGGTGGTTTTTG |

**Supplementary Table 4.** Primer sequences

| Primer             | Sequence                                          | Use               |
|--------------------|---------------------------------------------------|-------------------|
| GAPDH Fwd          | TGGCGGGGAAGTCAG                                   | qPCR              |
| GAPDH Rev          | CGGAGGAGAAATCGGGC                                 | qPCR              |
| gp120 Fwd          | TGAGCCAATCCCATACATTAT                             | qPCR              |
| gp120 Rev          | CCTGTTCCATTGAACGTCTTAT                            | qPCR              |
| METTL3 Fwd         | GACACGTGGAGCTCTATCCA                              | qPCR              |
| METTL3 Rev         | GGAAGGTTGGAGACAATGCT                              | qPCR              |
| METTL14 Fwd        | TCCCAAATCTAAATCTGACCG                             | qPCR              |
| METTL14 Rev        | CTCTAAAGCCACCTCTTTCTC                             | qPCR              |
| AlkBH5 Fwd         | AGGGACCCTGCTCTGAAAC                               | qPCR              |
| AlkBH5 Rev         | TCCTTGTCCTCTCCAGGAT                               | qPCR              |
| RRE Fwd            | GAGCAGCAGGAAGCACTATG                              | qPCR              |
| RRE Rev            | CCTCAATAGCCCTCAGCAA                               | qPCR              |
| $\beta$ -actin Fwd | CACTCTTCCAGCCTTCCTTC                              | qPCR              |
| $\beta$ -actin Rev | GGATGTCCACGTCACACTTC                              | qPCR              |
| 28S 4189           | AGCTCGCCTTAGGACACCTGCGT                           | AMV/Tth extension |
| 28S 4190           | GAGCTCGCCTTAGGACACCTGCG                           | AMV/Tth extension |
| A7877              | AGACAATAATTGTCTGGCCTGTACCGTCAGCG                  | AMV/Tth extension |
| A7883              | TGCTGCACTATATCAGACAATAATTGTCTGGCCTGTACCG          | AMV/Tth extension |
| Mut1 Fwd           | ACTATGGGCGCACGGCCAATGGCGCTGACGGTACAGGCCAGA        | mutagenesis       |
| Mut1 Rev           | TCTGGCCTGTACCGTCAGCGCCATTGGCCGTGCGCCCATAGT        | mutagenesis       |
| Mut2 Fwd           | GGCGCACGGTCAATGACGCTGGCGGTACAGGCCAGACAATTAT       | mutagenesis       |
| Mut2 Rev           | ATAATTGTCTGGCCTGTACCGCCAGCGTCATTGACCGTGCGCC       | mutagenesis       |
| Mut3 Fwd           | CACTATGGGCGCACGGCCAATGGCGCTGGCGGTACAGGCCAGACAATTA | mutagenesis       |
| Mut3 Rev           | TAATTGTCTGGCCTGTACCGCCAGCGCCATTGGCCGTGCGCCCATAGTG | mutagenesis       |
